# Supplementary material
Source: publisher site journal article supplement (https://www.dovepress.com/article/443479)

## **Supplementary materials**

Supplementary Table S1. The physicochemical parameters for the active ingredients of NDSP

Supplementary Table S2. Drug targets of NDSP

Supplementary Table S3 Therapeutic targets for ischemic stroke

Supplementary Table S4 The intersection genes of drug and disease

Supplementary Table S5 The key active ingredients of NDSP

Supplementary Table S6 The core target of NDSP

Supplementary Table S7 Parameters of molecular docking

Supplementary Figure 1 Full-length blots/gels

**Supplementary Table S1. The physicochemical parameters for the active ingredients of NDSP**

| Number | Name                                                                                               | OB (%) | DL   | Mol ID    | Database              | Medicines                                                                                                                            |
|--------|----------------------------------------------------------------------------------------------------|--------|------|-----------|-----------------------|--------------------------------------------------------------------------------------------------------------------------------------|
| 1      | Mandenol                                                                                           | 42     | 0.19 | MOL001494 | TCMSP                 | Ligusticum chuanxiong<br>Hort, Panax notoginseng<br>(Burk.) F.H. Chen                                                                |
| 2      | Myricanone                                                                                         | 40.6   | 0.51 | MOL002135 | TCMSP                 | Ligusticum chuanxiong<br>Hort                                                                                                        |
| 3      | Perlolyrine                                                                                        | 65.95  | 0.27 | MOL002140 | TCMSP/ETCM<br>/Batman | Ligusticum chuanxiong<br>Hort                                                                                                        |
| 4      | senkyunone                                                                                         | 47.66  | 0.24 | MOL002151 | TCMSP/ETCM            | <i>Ligusticum chuanxiong</i><br>Hort                                                                                                 |
| 5      | wallichilide                                                                                       | 42.31  | 0.71 | MOL002157 | TCMSP/ETCM            | <i>Ligusticum chuanxiong</i><br>Hort                                                                                                 |
| 6      | sitosterol                                                                                         | 36.91  | 0.75 | MOL000359 | TCMSP                 | <i>Ligusticum chuanxiong</i><br>Hort                                                                                                 |
| 7      | FA                                                                                                 | 68.96  | 0.71 | MOL000433 | TCMSP/ETCM            | <i>Ligusticum chuanxiong</i><br>Hort                                                                                                 |
| 8      | Clionasterol                                                                                       | 36.91  | 0.75 | MOL001771 | TCMSP/ETCM<br>/Batman | Ligusticum chuanxiong<br>Hort, Pueraria lobata<br>(wild.) Ohwi, Carthamus<br>tinctorius L, Panax<br>notoginseng (Burk.) F.H.<br>Chen |
| 9      | Glyceryl<br>palmitate                                                                              | NA     | NA   | NA        | ETCM                  | <i>Ligusticum chuanxiong</i><br>Hort                                                                                                 |
| 10     | Butylphthali<br>de                                                                                 | NA     | NA   | NA        | ETCM/Batman           | <i>Ligusticum chuanxiong</i><br>Hort                                                                                                 |
| 11     | 3-[(2,6-Dide<br>oxy-3-o-met<br>hylhexopyra<br>nosyl)oxy]-<br>14-hydroxy<br>card-20(22)<br>-enolide | NA     | NA   | NA        | ETCM                  | <i>Ligusticum chuanxiong</i><br>Hort                                                                                                 |
| 12     | Senkyunoli<br>de                                                                                   | NA     | NA   | NA        | ETCM                  | <i>Ligusticum chuanxiong</i><br>Hort                                                                                                 |
| 13     | Spathulenol                                                                                        | NA     | NA   | NA        | ETCM                  | <i>Ligusticum chuanxiong</i><br>Hort                                                                                                 |
| 14     | 2-Methoxy-<br>4-(3-Metho<br>xy-1-Propen<br>yl)-Phenol                                              | NA     | NA   | NA        | ETCM/Batman           | <i>Ligusticum chuanxiong</i><br>Hort                                                                                                 |
| 15     | (Z)-4,5-Dih<br>ydro-6,7-Ci                                                                         | NA     | NA   | NA        | ETCM                  | <i>Ligusticum chuanxiong</i><br>Hort                                                                                                 |

|    |                                                                                         |       |      |           |             |                                      |
|----|-----------------------------------------------------------------------------------------|-------|------|-----------|-------------|--------------------------------------|
| 16 | s-Dihydroxy-3-Butylidene Phthalide Sedanonic Acid                                       | NA    | NA   | NA        | ETCM/Batman | <i>Ligusticum chuanxiong</i><br>Hort |
| 17 | (Z)-4,5-Dihydro-6,7-Trans-Dihydroxy-3-Butylidene Phthalide                              | NA    | NA   | NA        | ETCM        | <i>Ligusticum chuanxiong</i><br>Hort |
| 18 | Chuanxiong zine                                                                         | NA    | NA   | NA        | ETCM        | <i>Ligusticum chuanxiong</i><br>Hort |
| 19 | (Z)-6,7-Epoxy-6,7-Dihydrodigustilide                                                    | NA    | NA   | NA        | ETCM/Batman | <i>Ligusticum chuanxiong</i><br>Hort |
| 20 | Z'-3,8-Dihydro-6,6',7,3'-diligustilide                                                  | NA    | NA   | NA        | ETCM        | <i>Ligusticum chuanxiong</i><br>Hort |
| 21 | (Z,Z')-Diligustilide                                                                    | NA    | NA   | NA        | ETCM/Batman | <i>Ligusticum chuanxiong</i><br>Hort |
| 22 | 3-N-Butyl-3-Hydroxy-4,5,6,7-Tetrahydro-6,7-Dihydroxy Phthalide                          | NA    | NA   | NA        | ETCM/Batman | <i>Ligusticum chuanxiong</i><br>Hort |
| 23 | 5-Hydroxymethyl-6-Endo-(3'-Methoxy-4'-Hydroxyphenyl)-8-Oxabicyclo[3.2.1]-Oct-3-En-2-One | NA    | NA   | NA        | ETCM        | <i>Ligusticum chuanxiong</i><br>Hort |
| 24 | Cnidium Lactone                                                                         | NA    | NA   | NA        | ETCM/Batman | <i>Ligusticum chuanxiong</i><br>Hort |
| 25 | Ethyl Linoleate                                                                         | 46.1  | 0.2  | MOL001495 | Batman      | <i>Ligusticum chuanxiong</i><br>Hort |
| 26 | Chrysanthe                                                                              | 38.72 | 0.58 | MOL004492 | Batman      | <i>Ligusticum chuanxiong</i>         |

|    |                                                                                     |    |    |    |        |                                      |
|----|-------------------------------------------------------------------------------------|----|----|----|--------|--------------------------------------|
|    | maxanthin                                                                           |    |    |    |        | Hort                                 |
| 27 | L-Valine-L-Valine Anhydride                                                         | NA | NA | NA | Batman | <i>Ligusticum chuanxiong</i><br>Hort |
| 28 | Fenchone                                                                            | NA | NA | NA | Batman | <i>Ligusticum chuanxiong</i><br>Hort |
| 29 | Epoxydihydrolinalool                                                                | NA | NA | NA | Batman | <i>Ligusticum chuanxiong</i><br>Hort |
| 30 | Dillapiol                                                                           | NA | NA | NA | Batman | <i>Ligusticum chuanxiong</i><br>Hort |
| 31 | Methyl Phenyl Carbinol                                                              | NA | NA | NA | Batman | <i>Ligusticum chuanxiong</i><br>Hort |
| 32 | Borneol                                                                             | NA | NA | NA | Batman | <i>Ligusticum chuanxiong</i><br>Hort |
| 33 | Sec-Butyl Isothiocyanate                                                            | NA | NA | NA | Batman | <i>Ligusticum chuanxiong</i><br>Hort |
| 34 | Camphor                                                                             | NA | NA | NA | Batman | <i>Ligusticum chuanxiong</i><br>Hort |
| 35 | Citronellol                                                                         | NA | NA | NA | Batman | <i>Ligusticum chuanxiong</i><br>Hort |
| 36 | Z-Ligustilide                                                                       | NA | NA | NA | Batman | <i>Ligusticum chuanxiong</i><br>Hort |
| 37 | Vallesiachotamine                                                                   | NA | NA | NA | Batman | <i>Ligusticum chuanxiong</i><br>Hort |
| 38 | 1-Methoxy-2-Methylanthraquinone                                                     | NA | NA | NA | Batman | <i>Ligusticum chuanxiong</i><br>Hort |
| 39 | Vanillin Acetate                                                                    | NA | NA | NA | Batman | <i>Ligusticum chuanxiong</i><br>Hort |
| 40 | N-Butyl-2-Ethylbutylphthalate                                                       | NA | NA | NA | Batman | <i>Ligusticum chuanxiong</i><br>Hort |
| 41 | 2,3-Dihydro-5,7-Dihydroxy-2,6-Dimethyl-8-(3-Methyl-2-Butenyl)-4H-1-Benzopyran-4-One | NA | NA | NA | Batman | <i>Ligusticum chuanxiong</i><br>Hort |
| 42 | Cocaine                                                                             | NA | NA | NA | Batman | <i>Ligusticum chuanxiong</i><br>Hort |

|    |                               |        |      |           |                   |                                                                                                                   |
|----|-------------------------------|--------|------|-----------|-------------------|-------------------------------------------------------------------------------------------------------------------|
| 43 | Senkyunolide K                | NA     | NA   | NA        | Batman            | <i>Ligusticum chuanxiong</i><br>Hort                                                                              |
| 44 | Terpinen-4-Ol                 | NA     | NA   | NA        | Batman            | <i>Ligusticum chuanxiong</i><br>Hort                                                                              |
| 45 | formononetin                  | 69.67  | 0.21 | MOL000392 | TCMSP/Batman/ETCM | <i>Pueraria lobata</i> (wild.)<br>Ohwi                                                                            |
| 46 | beta-sitosterol               | 36.91  | 0.75 | MOL000358 | TCMSP             | <i>Pueraria lobata</i> (wild.)<br>Ohwi, <i>Carthamus tinctorius</i> L, <i>Panax notoginseng</i> (Burk.) F.H. Chen |
| 47 | 3'-Methoxydaidzein            | 48.57  | 0.24 | MOL002959 | TCMSP             | <i>Pueraria lobata</i> (wild.)<br>Ohwi                                                                            |
| 48 | Daidzein-4,7-diglucoside      | 47.27  | 0.67 | MOL003629 | TCMSP/ETCM        | <i>Pueraria lobata</i> (wild.)<br>Ohwi                                                                            |
| 49 | Coumestrol                    | 32.487 | 0.34 | MOL012976 | Batman/ETCM       | <i>Pueraria lobata</i> (wild.)<br>Ohwi                                                                            |
| 50 | Robinin                       | 39.844 | 0.71 | MOL006070 | Batman/ETCM       | <i>Pueraria lobata</i> (wild.)<br>Ohwi                                                                            |
| 51 | Coumingidine                  | NA     | NA   | NA        | Batman            | <i>Pueraria lobata</i> (wild.)<br>Ohwi                                                                            |
| 52 | Dauricine                     | NA     | NA   | NA        | Batman            | <i>Pueraria lobata</i> (wild.)<br>Ohwi                                                                            |
| 53 | Tuberosin                     | NA     | NA   | NA        | Batman            | <i>Pueraria lobata</i> (wild.)<br>Ohwi                                                                            |
| 54 | Robustadiol A                 | NA     | NA   | NA        | Batman            | <i>Pueraria lobata</i> (wild.)<br>Ohwi                                                                            |
| 55 | Puerarol                      | NA     | NA   | NA        | Batman/ETCM       | <i>Pueraria lobata</i> (wild.)<br>Ohwi                                                                            |
| 56 | Dalbergene                    | NA     | NA   | NA        | Batman            | <i>Pueraria lobata</i> (wild.)<br>Ohwi                                                                            |
| 57 | 5-Methylhydantoin             | NA     | NA   | NA        | Batman            | <i>Pueraria lobata</i> (wild.)<br>Ohwi                                                                            |
| 58 | 3-Methoxy Pyridine            | NA     | NA   | NA        | Batman            | <i>Pueraria lobata</i> (wild.)<br>Ohwi                                                                            |
| 59 | Kudzusapogenol B Methyl Ester | NA     | NA   | NA        | ETCM              | <i>Pueraria lobata</i> (wild.)<br>Ohwi                                                                            |
| 60 | Kudzusapogenol C              | NA     | NA   | NA        | ETCM              | <i>Pueraria lobata</i> (wild.)<br>Ohwi                                                                            |
| 61 | (5S)-5-methylimidazoli        | NA     | NA   | NA        | ETCM              | <i>Pueraria lobata</i> (wild.)<br>Ohwi                                                                            |

|    |                                                                                                                  |       |      |           |                       |                                        |
|----|------------------------------------------------------------------------------------------------------------------|-------|------|-----------|-----------------------|----------------------------------------|
|    | dine-2,4-dione                                                                                                   |       |      |           |                       |                                        |
| 62 | (-)-Tuberostin                                                                                                   | NA    | NA   | NA        | ETCM                  | <i>Pueraria lobata</i> (wild.)<br>Ohwi |
| 63 | puerarin                                                                                                         | 24.03 | 0.69 | MOL012297 | Supplement            | <i>Pueraria lobata</i> (wild.)<br>Ohwi |
| 64 | Flavoxanthin                                                                                                     | 60.41 | 0.56 | MOL002680 | TCMSP                 | <i>Carthamus tinctorius</i> L          |
| 65 | 4-[(E)-4-(3,5-dimethoxy-4-oxo-1-cyclohexa-2,5-dienylidene)but-2-enylidene]-2,6-dimethoxycyclohexa-2,5-dien-1-one | 48.47 | 0.36 | MOL002694 | TCMSP                 | <i>Carthamus tinctorius</i> L          |
| 66 | lignan                                                                                                           | 43.32 | 0.65 | MOL002695 | TCMSP                 | <i>Carthamus tinctorius</i> L          |
| 67 | lupeol-palmitate                                                                                                 | 33.98 | 0.32 | MOL002698 | TCMSP                 | <i>Carthamus tinctorius</i> L          |
| 68 | Phytoene                                                                                                         | 39.56 | 0.5  | MOL002706 | TCMSP                 | <i>Carthamus tinctorius</i> L          |
| 69 | phytofluene                                                                                                      | 43.18 | 0.5  | MOL002707 | TCMSP                 | <i>Carthamus tinctorius</i> L          |
| 70 | Pyrethrin II                                                                                                     | 48.36 | 0.35 | MOL002710 | TCMSP                 | <i>Carthamus tinctorius</i> L          |
| 71 | 6-Hydroxykaempferol                                                                                              | 62.13 | 0.27 | MOL002712 | TCMSP                 | <i>Carthamus tinctorius</i> L          |
| 72 | baicalein                                                                                                        | 33.52 | 0.21 | MOL002714 | TCMSP                 | <i>Carthamus tinctorius</i> L          |
| 73 | qt_carthamone                                                                                                    | 51.03 | 0.2  | MOL002717 | TCMSP                 | <i>Carthamus tinctorius</i> L          |
| 74 | 6-Hydroxyningaringenin                                                                                           | 33.23 | 0.24 | MOL002719 | TCMSP/ETCM<br>/Batman | <i>Carthamus tinctorius</i> L          |
| 75 | quercetagenin                                                                                                    | 45.01 | 0.31 | MOL002721 | TCMSP                 | <i>Carthamus tinctorius</i> L          |
| 76 | 7,8-dimethyl-1H-pyrimido[5,6-g]quinoxaline-2,4-dione                                                             | 45.75 | 0.19 | MOL002757 | TCMSP                 | <i>Carthamus tinctorius</i> L          |
| 77 | beta-carotene                                                                                                    | 37.18 | 0.58 | MOL002773 | TCMSP                 | <i>Carthamus tinctorius</i> L          |
| 78 | Baicalin                                                                                                         | 40.12 | 0.75 | MOL002776 | TCMSP                 | <i>Carthamus tinctorius</i> L          |
| 79 | kaempferol                                                                                                       | 41.88 | 0.24 | MOL000422 | TCMSP/Batma           | <i>Carthamus tinctorius</i> L          |

|    |                                    |       |      |           |                   |                                                                                          |
|----|------------------------------------|-------|------|-----------|-------------------|------------------------------------------------------------------------------------------|
| 80 | Stigmasteryl                       | 43.83 | 0.76 | MOL000449 | TCMSP/Batman      | Carthamus tinctorius L, Panax notoginseng (Burk.) F.H. Chen                              |
| 81 | luteolin                           | 36.16 | 0.25 | MOL000006 | TCMSP             | Carthamus tinctorius L                                                                   |
| 82 | CLR                                | 37.87 | 0.68 | MOL000953 | TCMSP             | Carthamus tinctorius L                                                                   |
| 83 | quercetin                          | 46.43 | 0.28 | MOL000098 | TCMSP/ETCM/Batman | Carthamus tinctorius L, Panax notoginseng (Burk.) F.H. Chen, Crataegus pinnatifida Bunge |
| 84 | Onjixanthone I                     | 79.16 | 0.3  | MOL003370 | ETCM/Batman       | Carthamus tinctorius L                                                                   |
| 85 | Dehydrosafynol                     | NA    | NA   | NA        | ETCM/Batman       | Carthamus tinctorius L                                                                   |
| 86 | 15a,20a-Dihydroxy-a4-Pregnen-3-One | NA    | NA   | NA        | ETCM              | Carthamus tinctorius L                                                                   |
| 87 | Onjixanthone II                    | NA    | NA   | NA        | ETCM/Batman       | Carthamus tinctorius L                                                                   |
| 88 | Alpha-Onocerin                     | 39.31 | 0.73 | MOL005421 | Batman            | Carthamus tinctorius L                                                                   |
| 89 | Linoleyl Acetate                   | 42.1  | 0.2  | MOL001645 | Batman            | Carthamus tinctorius L, Crataegus pinnatifida Bunge                                      |
| 90 | Sagittariol                        | NA    | NA   | NA        | Batman            | Carthamus tinctorius L                                                                   |
| 91 | 2-Hexanol                          | NA    | NA   | NA        | Batman            | Carthamus tinctorius L                                                                   |
| 92 | Dehydroshikimic Acid               | NA    | NA   | NA        | Batman            | Carthamus tinctorius L                                                                   |
| 93 | DFV                                | 32.76 | 0.18 | MOL001792 | TCMSP             | Panax notoginseng (Burk.) F.H. Chen                                                      |
| 94 | Diop                               | 43.59 | 0.39 | MOL002879 | TCMSP/ETCM        | Panax notoginseng (Burk.) F.H. Chen                                                      |
| 95 | ginsenoside rh2                    | 36.32 | 0.56 | MOL005344 | TCMSP             | Panax notoginseng (Burk.) F.H. Chen                                                      |
| 96 | ginsenoside f2                     | 36.43 | 0.25 | MOL007475 | TCMSP             | Panax notoginseng (Burk.) F.H. Chen                                                      |
| 97 | Sitogluside                        | 20.63 | 0.62 | MOL000357 | ETCM              | Panax notoginseng (Burk.) F.H. Chen                                                      |
| 98 | Dicapryl Phthalate                 | 40.59 | 0.40 | MOL002032 | ETCM              | Panax notoginseng (Burk.) F.H. Chen                                                      |
| 99 | Poriferaster                       | 43.83 | 0.76 | MOL001659 | ETCM              | Panax notoginseng                                                                        |

|     |                                                   |        |      |           |             |                                               |
|-----|---------------------------------------------------|--------|------|-----------|-------------|-----------------------------------------------|
|     | ol                                                |        |      |           |             | (Burk.) F.H. Chen                             |
| 100 | Cyclo-(Ala-Pro)                                   | NA     | NA   | NA        | ETCM        | <i>Panax notoginseng</i><br>(Burk.) F.H. Chen |
| 101 | Cyclododecanone                                   | NA     | NA   | NA        | ETCM/Batman | <i>Panax notoginseng</i><br>(Burk.) F.H. Chen |
| 102 | Cyclo-(Ala-Val)                                   | NA     | NA   | NA        | ETCM        | <i>Panax notoginseng</i><br>(Burk.) F.H. Chen |
| 103 | Panaxydol                                         | NA     | NA   | NA        | ETCM        | <i>Panax notoginseng</i><br>(Burk.) F.H. Chen |
| 104 | 2,8-Dimethyl-5-Acetyl-Bicyclo[5,3,0]Decadiene-1,8 | NA     | NA   | NA        | ETCM        | <i>Panax notoginseng</i><br>(Burk.) F.H. Chen |
| 105 | Panaxadiol                                        | 33.09  | 0.79 | MOL005376 | Batman      | <i>Panax notoginseng</i><br>(Burk.) F.H. Chen |
| 106 | Cycloeucaleanol                                   | 39.73  | 0.79 | MOL009653 | Batman      | <i>Panax notoginseng</i><br>(Burk.) F.H. Chen |
| 107 | (-)-Dicentrine                                    | NA     | NA   | NA        | Batman      | <i>Panax notoginseng</i><br>(Burk.) F.H. Chen |
| 108 | (-)-2d,4d,6d,8d-Tetramethyl Undecanoic Acid       | NA     | NA   | NA        | Batman      | <i>Panax notoginseng</i><br>(Burk.) F.H. Chen |
| 109 | Sandaracopimarinol                                | NA     | NA   | NA        | Batman      | <i>Panax notoginseng</i><br>(Burk.) F.H. Chen |
| 110 | Ethyl Pyroglutamate                               | NA     | NA   | NA        | Batman      | <i>Panax notoginseng</i><br>(Burk.) F.H. Chen |
| 111 | Dithiocyclopentene                                | NA     | NA   | NA        | Batman      | <i>Panax notoginseng</i><br>(Burk.) F.H. Chen |
| 112 | Coprine                                           | NA     | NA   | NA        | Batman      | <i>Panax notoginseng</i><br>(Burk.) F.H. Chen |
| 113 | 3,4-Dimethylbenzoic Acid                          | NA     | NA   | NA        | Batman      | <i>Panax notoginseng</i><br>(Burk.) F.H. Chen |
| 114 | Suchilactone                                      | 57.519 | 0.56 | MOL005384 | Batman      | <i>Crataegus pinnatifida</i><br>Bunge         |
| 115 | Proscillaridin A                                  | NA     | NA   | NA        | Batman      | <i>Crataegus pinnatifida</i><br>Bunge         |
| 116 | Ethylnotopterol                                   | NA     | NA   | NA        | Batman      | <i>Crataegus pinnatifida</i><br>Bunge         |



|     |                                                 |       |      |           |            |                                       |
|-----|-------------------------------------------------|-------|------|-----------|------------|---------------------------------------|
| 117 | 4-Methylcyclohexanone                           | NA    | NA   | NA        | Batman     | <i>Crataegus pinnatifida</i><br>Bunge |
| 118 | Citronellal                                     | NA    | NA   | NA        | Batman     | <i>Crataegus pinnatifida</i><br>Bunge |
| 119 | 3-Methylhistidin                                | NA    | NA   | NA        | Batman     | <i>Crataegus pinnatifida</i><br>Bunge |
| 120 | 3,7,11-Trimethyldodecan-1,7,10-Trien-3-Ol-9-One | NA    | NA   | NA        | Batman     | <i>Crataegus pinnatifida</i><br>Bunge |
| 121 | Epicatechin                                     | NA    | NA   | NA        | Batman     | <i>Crataegus pinnatifida</i><br>Bunge |
| 122 | Gamma-Decanolactone                             | NA    | NA   | NA        | Batman     | <i>Crataegus pinnatifida</i><br>Bunge |
| 123 | Dimethyl Camphorate                             | NA    | NA   | NA        | Batman     | <i>Crataegus pinnatifida</i><br>Bunge |
| 124 | 3-Methyl-1,2-Cyclopentanediol                   | NA    | NA   | NA        | Batman     | <i>Crataegus pinnatifida</i><br>Bunge |
| 125 | 1-Ethyl-4,8-Dimethoxy-Beta-Carboline            | NA    | NA   | NA        | Batman     | <i>Crataegus pinnatifida</i><br>Bunge |
| 126 | 2-Methylcyclopentanone                          | NA    | NA   | NA        | Batman     | <i>Crataegus pinnatifida</i><br>Bunge |
| 127 | Squalene                                        | 33.55 | 0.42 | MOL001506 | ETCM       | <i>Crataegus pinnatifida</i><br>Bunge |
| 128 | Eburicoic Acid                                  | 38.70 | 0.81 | MOL000287 | ETCM       | <i>Crataegus pinnatifida</i><br>Bunge |
| 129 | Lanosterol                                      | 42.12 | 0.75 | MOL001979 | ETCM       | <i>Crataegus pinnatifida</i><br>Bunge |
| 130 | Eburicol                                        | 42.37 | 0.77 | MOL002588 | ETCM       | <i>Crataegus pinnatifida</i><br>Bunge |
| 131 | Dehydroeburicoic Acid                           | 44.17 | 0.83 | MOL000300 | ETCM       | <i>Crataegus pinnatifida</i><br>Bunge |
| 132 | Officinalic Acid                                | NA    | NA   | NA        | ETCM       | <i>Crataegus pinnatifida</i><br>Bunge |
| 133 | ursolic acid                                    | 16.77 | 0.75 | MOL000511 | Supplement | <i>Crataegus pinnatifida</i><br>Bunge |
| 134 | Hydroxysafflor Yellow                           | NA    | NA   | NA        | Supplement | <i>Carthamus tinctorius</i> L         |

|     |                         |      |      |           |            |                                               |
|-----|-------------------------|------|------|-----------|------------|-----------------------------------------------|
| 135 | A<br>Notoginsenoside R1 | 4.27 | 0.13 | MOL012851 | Supplement | <i>Panax notoginseng</i><br>(Burk.) F.H. Chen |
|-----|-------------------------|------|------|-----------|------------|-----------------------------------------------|

---

**Supplementary Table S2. Drug targets of NDSP**

|             |              |         |         |         |              |              |              |        |
|-------------|--------------|---------|---------|---------|--------------|--------------|--------------|--------|
| STAT3       | GRM2         | ALOX12  | LIMK2   | PDE8B   | FASN         | RPA1         | CA5A         | EPHB4  |
| ESR1        | JAK3         | AKR1B1  | CDC25B  | HTR2A   | GPR119       | OAT          | ERCC5        | NFKB1  |
| ESR2        | JAK2         | PDE5A   | GRIA1   | DRD3    | PPP5C        | DHODH        | FEN1         | CFTR   |
| BRD4        | PLK1         | TAS2R31 | APP     | HTR6    | PPP1CA       | FABP2        | TOP1         | GLO1   |
| BRD2        | HSP90AA<br>1 | ANPEP   | CTSD    | MCHR1   | AKR1C2       | ABCC9        | FCER2        | ARG1   |
| MDM2        | ECE1         | PPIA    | ACACA   | HTR1F   | RARG         | KCNJ11       | PLAA         | AHR    |
| ADORA2<br>A | HCRTR2       | GCGR    | SLC5A2  | HTR7    | RARB         | KCNE1        | WEE1         | EZR    |
| MAPK14      | HCRTR1       | ALPL    | S1PR3   | SLC22A2 | RARA         | TRPV3        | CCR9         | NTRK1  |
| KCNA5       | PYGL         | PLA2G1B | S1PR1   | SLC47A1 | RXRG         | TOP2A        | GRK6         | DAPK3  |
| P2RX7       | TRPA1        | FGFR1   | ACACB   | DRD5    | NPY2R        | CA3          | F8           | BRSK2  |
| EPHX1       | NPY5R        | CDK5R1  | PDE2A   | HTR3B   | OXTR         | CA6          | ADAM10       | MARK3  |
| TNKS2       | GABRA2       | NOX4    | CA2     | HTR5A   | PTGIR        | PSMB5        | CD81         | SCN10A |
| FADS1       | SAE1         | LDHA    | CA4     | PBK     | ASAH1        | PSMB2        | CYP24A1      | PARP10 |
| CHRM4       | NR1H3        | FLT3    | CDC25A  | SLC18A2 | MGAT2        | PSMB1        | ACVRL1       | BCL2A1 |
| CHRM5       | NR1H2        | EGLN1   | NR1I3   | PHLPP2  | PDE6D        | ICMT         | GSK3A        | PDE1C  |
| CHRM2       | NAAA         | MMP3    | NR1H4   | CHEK2   | ITK          | UTS2R        | XIAP         | DAPK1  |
| CHRM3       | PDE4B        | ROCK2   | GPBAR1  | NMT1    | SLC6A15      | ACPP         | NR1D1        | MPG    |
| MTNR1A      | CCKBR        | ROCK1   | SHH     | PKN2    | CETP         | BRS3         | MALT1        | PIK3R1 |
| GABRA1      | CACNA1<br>D  | PTK2B   | UGT2B7  | PKN1    | MAP3K5       | EIF2AK3      | GLP1R        | CAMK2B |
| GABRB3      | HTR2B        | KDM1A   | POLA1   | DRD4    | BRD3         | STK3         | NUAK1        | NEK6   |
| GABRA6      | HTR2C        | DHFR    | NPC1L1  | HIF1A   | GSR          | STK26        | SPHK2        | AXL    |
| GABRA5      | LIMK1        | MSR1    | G6PD    | DPP4    | TXK          | HTR4         | SPHK1        | AKR1C4 |
| CYP11B1     | EGFR         | GSTA1   | GABBR1  | BIRC2   | FGR          | BDKRB1       | KCNN3        | AMY1A  |
| IMPDH2      | DUSP3        | PIM2    | NR3C1   | CDK1    | EPHA6        | PARP3        | S1PR2        | MAPT   |
| CYP11B2     | CASP3        | ADAM17  | DRD2    | PRCP    | PTK6         | MMP1         | SRD5A1       | INSR   |
| MTNR1B      | PTP4A3       | MMP7    | AKR1B10 | MELK    | EPHB3        | RASGRP3      | CCR4         | APEX1  |
| PTGS1       | FNTA         | ERN1    | POLB    | HCN4    | EPHA3        | PLA2G2A      | PDK1         | KLK1   |
| CCR2        | CYP19A1      | HDAC7   | KCNK2   | HCN1    | BTK          | CTSF         | HSP90B1      | KLK2   |
| ADORA2<br>B | KCNA3        | CALM1   | ALDH2   | HTR1A   | COQ8B        | GLI2         | AGTR1        | PGD    |
| GRM5        | FTO          | ADRA2B  | TBXAS1  | NQO1    | EPHA1        | CACNA2<br>D1 | IKBKB        | SNCA   |
| PABPC1      | GAPDH        | FLT4    | CTRC    | ERG     | FPR1         | AVPR1A       | KLKB1        | DNMT1  |
| HSD17B2     | BCL2         | PDGFRA  | IDO1    | CHRN3   | MYLK         | TRPV1        | SERPINE<br>1 | MMP14  |
| PDE10A      | ALDH1A<br>1  | MME     | CYP2A6  | NOS1    | HSP90AB<br>1 | C3AR1        | PLA2G5       | STAT1  |
| JUN         | PARP1        | LTB4R   | XPO1    | CDK9    | STAT6        | CAPN1        | PLA2G10      | FBP1   |
| MAOB        | TNKS         | OPRD1   | CTRB1   | DYRK1A  | CXCR2        | TACR1        | HNF4A        | PARP14 |

|             |             |        |              |         |              |              |        |         |
|-------------|-------------|--------|--------------|---------|--------------|--------------|--------|---------|
| CTSV        | SOAT1       | MAOA   | CTSH         | PDE7A   | KCNMA1       | RORB         | COMT   | PARP15  |
| CTSL        | HDAC6       | QPCT   | METAP1       | MPI     | MAP2K2       | CDK8         | DRD1   | NR1I2   |
| CHRM1       | HDAC1       | FDFT1  | CTSC         | TYK2    | MIF          | THRA         | F3     | H LCS   |
| ELANE       | RPS6KA2     | RORC   | CCR8         | METAP2  | NCOR1        | SLC5A1       | CHRNA4 | PRKACA  |
| PRKDC       | HSD11B1     | FYN    | CEL          | KAT2B   | MAPKAP<br>K2 | CCR3         | KCNN1  | ADA     |
| CTSB        | BRAF        | EPHA2  | CHRNA3       | GRM4    | HDAC11       | CACNA2<br>D2 | KCNN2  | NTRK2   |
| ALOX5       | SIGMAR1     | YES1   | MPO          | NISCH   | HDAC10       | PDE4A        | ADRB2  | NAE1    |
| CNR1        | CSNK2A1     | BLK    | ADH1A        | TNNI3K  | CMA1         | GNRHR        | ADRB1  | CYP1A1  |
| MEN1        | AR          | SYK    | ADH1C        | GCK     | RPS6KB1      | MCL1         | ADRB3  | ST6GAL1 |
| FKBP1A      | SLC6A2      | CSK    | SERPINA<br>6 | CDC7    | MKNK1        | F13A1        | OPRM1  | TACR2   |
| PSEN2       | CYP17A1     | PIK3CG | VDR          | CISD1   | SLC29A1      | CFD          | RBBP9  | SIRT1   |
| P2RX3       | CXCR3       | EPHB2  | SQLE         | PTPRC   | PLG          | TEK          | PDE1A  | PLA2G4A |
| MAPK11      | CACNA1<br>B | BMX    | HMGCR        | DGAT1   | CTSG         | GLI1         | EHMT2  | PI4KB   |
| SMO         | CCNE2       | LYN    | CYP2C19      | AKT1    | PDE9A        | KCNJ1        | EHMT1  | FKBP5   |
| TBXA2R      | CCNB3       | EPHA5  | SLC6A4       | HDAC2   | GPR18        | G6PC         | MAP2   | ERBB4   |
| LIPE        | CDK7        | EPHA4  | SREBF2       | CA13    | TDO2         | PTPRF        | AVPR1B | KNG1    |
| TAAR1       | BACE1       | ATP1A1 | FABP4        | CCNE1   | PGGT1B       | PTPN2        | MLNR   | TUBB1   |
| PLAU        | CTSK        | TTL    | PPARA        | XDH     | CPB1         | ADRA1B       | EZH2   | TRHR    |
| TRPM8       | CCNC        | F2RL1  | TERT         | AOC3    | RGS4         | MMP9         | MAPK7  | FPR2    |
| SLC6A9      | ICAM1       | PRKCA  | FABP3        | CNR2    | CASP7        | HPGDS        | FGFR3  | NR5A1   |
| TRPC6       | VCAM1       | GLRA1  | FABP5        | PTGES   | GABRG2       | KCNJ6        | IGF1R  | BRD9    |
| TRPC3       | SELE        | GLRA2  | PPARD        | FFAR1   | MMP2         | TTK          | PDPK1  | BACE2   |
| CYP26A1     | SLC6A3      | ALK    | FABP1        | F2R     | CLK3         | RIPK1        | MYLK2  | PGK1    |
| PTGDR2      | ADORA3      | MTOR   | CYP51A1      | GRIN2B  | PKM          | WNT3A        | CLK1   | MAP3K7  |
| ELOVL6      | GPR139      | PRKCQ  | JAK1         | AKR1C1  | PPOX         | TK1          | SELP   | ATM     |
| ALOX15      | NQO2        | ERBB2  | RORA         | NPY1R   | KCNN4        | MMP12        | MAP4K4 | AGPAT2  |
| NAMPT       | KCNB1       | CCNT1  | PTGER1       | AVPR2   | DYRK1B       | CAPN2        | CALCRL | F9      |
| RBP4        | HDAC3       | PDE3A  | PTGER2       | AKR1C3  | TNF          | F11          | AKT2   | GRIN1   |
| TACR3       | PARP2       | PDE3B  | DHCR7        | F2RL3   | SRD5A2       | NFKBIA       | ATP12A | HPGD    |
| MDM4        | TLR9        | SORD   | PTPN6        | CYP26B1 | PTPN11       | NEK2         | DPP8   | HRH2    |
| BCHE        | SIRT2       | MAPK1  | NOS2         | NR3C2   | HSPA1A       | POLR1A       | DPP7   | ABHD6   |
| CES1        | CSF1R       | NR4A2  | HSD11B2      | TGM1    | CXCL8        | CPT1A        | DPP9   | NOD1    |
| EPHX2       | FAAH        | PIK3CA | PRKCE        | INCENP  | KDM6B        | CPT2         | MC4R   | NOD2    |
| CCR1        | CSNK1E      | PRKCD  | IL1B         | PYGM    | MAPK3        | CCND1        | SSTR2  | BMP1    |
| IDH1        | CHEK1       | AMPD3  | ADRA2A       | GRM1    | TTR          | SLC2A1       | SSTR4  | BAD     |
| CTSS        | PGR         | GYS1   | ADRA2C       | NLRP3   | CXCR1        | SLC2A3       | NPBWR1 | CCND3   |
| HSD17B3     | GUSB        | PRKCB  | ADRA1A       | SOAT2   | KDM4E        | PTK2         | GHSR   | HDAC5   |
| ALOX5A<br>P | CELA1       | CDK4   | PCSK7        | ABL1    | GRK2         | CPT1B        | HCN2   | HDAC4   |

|         |         |             |             |         |              |               |             |              |
|---------|---------|-------------|-------------|---------|--------------|---------------|-------------|--------------|
| CRHR1   | PREP    | ADK         | C1R         | CASR    | KDM4A        | SLC6A1        | HCN3        | HDAC9        |
| RAF1    | C5AR1   | F2          | EDNRA       | PFKFB3  | KDM4D        | HCK           | TPSAB1      | NCOR2        |
| CDK2    | BMP4    | RPS6KA5     | PLA2G6      | SCARB1  | NR4A1        | ACE           | MC1R        | ALPG         |
| PIM1    | PDE4C   | F10         | ADRA1D      | TYMS    | SORT1        | PSENEEN       | CAMK2D      | EP300        |
| MAPK8   | TGFBR1  | GSTP1       | PDE4D       | SLC19A1 | PTGER4       | LGMN          | LNPEP       | DBF4         |
| KCNH2   | CA1     | GSTM2       | HRH3        | FOLR1   | SLCO1B1      | SLC2A2        | PRKCZ       | CSNK1G1      |
| PTAFR   | FAP     | PPP2CA      | HRH4        | FOLR2   | BCAT2        | CSNK1D        | BRPF1       | RPS6KA1      |
| MAPK10  | CA7     | REN         | PRSS1       | SLC46A1 | DAO          | P2RY1         | BIRC3       | IGFBP6       |
| SRC     | TGM2    | PRF1        | CHRNA4      | HDAC8   | MAP2K1       | PHOSPH<br>O1  | AURKB       | IGFBP4       |
| MAPK9   | CENPE   | CBFB        | THRB        | FPGS    | ACE2         | CACNA1<br>C   | CACNA1<br>H | IGFBP5       |
| DYRK2   | KDM4C   | ITGAL       | RAPGEF4     | GART    | CASP1        | SSTR3         | AKT3        | IGFBP2       |
| PIM3    | PPARG   | LRRK2       | CREBBP      | ATIC    | MKNK2        | GPR55         | MBTPS1      | IGFBP1       |
| VCP     | ABCG2   | PIK3CD      | KCNJ5       | PRKCH   | CTSA         | CYP1A2        | HTR1B       | HLA-DR<br>B1 |
| PANK3   | CES2    | PIK3CB      | ALDH3A<br>1 | PRKCG   | SLC22A1<br>2 | TYR           | HTR1D       | SCN5A        |
| TSPO    | PTPN1   | SCD         | CDC25C      | PAM     | AKR1A1       | CBR1          | UGCG        | NPEPPS       |
| FLT1    | SHBG    | GBA         | HTT         | TRPV4   | HCAR2        | PTPRS         | PAK1        | RHOA         |
| SCN9A   | RXRA    | CDK6        | HMOX1       | ACP1    | CCR5         | MGAM          | MAP4K2      | SLC6A5       |
| LCK     | PTGS2   | BCL2L1      | ABCC1       | ABCB1   | PLEC         | ESRRA         | BIRC8       | PRLHR        |
| MMP13   | ACHE    | AURKA       | EGLN3       | LPAR6   | IDE          | ESRRB         | MC5R        | CAMKK2       |
| KIF11   | ADORA1  | MAP3K14     | CHRNA7      | LPAR5   | ITGB1        | PON1          | ITGA2B      | SELL         |
| MMP8    | HSD17B1 | PDGFRB      | HTR3A       | IL2     | GPR35        | PLAT          | CXCR4       | MMP16        |
| MAP3K8  | PLA2G7  | KIT         | ACKR3       | IKBKE   | HAO2         | CYP1B1        | CPB2        | NEU4         |
| CA12    | RET     | TYRO3       | BDKRB2      | TBK1    | FOLH1        | STS           | NMUR2       | GABBR2       |
| CA9     | GSK3B   | CYP2C9      | IRAK4       | OPRK1   | KMO          | IGFBP3        | RPS6KA3     | SLC22A6      |
| MGLL    | KDR     | CYP3A4      | HRH1        | PPM1B   | KDM5A        | CA14          | CD38        | PHF8         |
| SLC18A3 | MET     | GRB2        | LTA4H       | PPP1CC  | KDM5B        | CA5B          | PLK4        | PTGFR        |
| KDM5C   | USP13   | TH          | FES         | PEPD    | PDE11A       | HGFAC         | ITGB7       | HSD17B1<br>4 |
| KDM2A   | PDE7B   | NUDT1       | ROS1        | ENPEP   | ATP4B        | FURIN         | ITGB5       | YWHAG        |
| GSTK1   | EPAS1   | BAZ2B       | NTRK3       | SLC15A1 | QTRT1        | PCSK6         | MPL         | PGF          |
| HAO1    | HPRT1   | BAZ2A       | LTK         | ERAP2   | PORCN        | PGC           | P2RY12      | VEGFA        |
| PTGES2  | PER2    | NOS3        | IL6         | KISS1R  | SLC9A1       | TNFRSF1<br>0A | PPM1A       | PDE1B        |
| PTGDR   | KMT5A   | ADAMTS<br>5 | UPP1        | WDR5    | CHUK         | LAP3          | ITGA4       | MAP3K12      |
| CDC45   | GLUL    | CSNK2A2     | EIF2AK1     | GZMB    | GRIK1        | NTSR1         | APLNR       | RAP1A        |
| TP53    | SLC1A2  | DYRK4       | STK16       | XPNPEP1 | GRIK2        | DNM1          | CASP8       | KRAS         |
| PTGER3  | RNPEP   | PLA2G4B     | CDK5        | XPNPEP2 | HSF1         | PDF           | PLAUR       | DNAJA1       |
| RXRβ    | ADH7    | PLA2G4C     | GRK3        | TMPRSS6 | CCKAR        | CSNK1A1       | FKBP4       | CASP6        |

|         |        |         |         |        |        |        |         |       |
|---------|--------|---------|---------|--------|--------|--------|---------|-------|
| SLC16A1 | SLC5A7 | PIN1    | CASP9   | HPN    | EDNRB  | ADH1B  | GCG     | DUSP1 |
| DAGLA   | FER    | KYNU    | CASP2   | HLA-A  | ITGAV  | TPO    | CYSLTR1 | TDP2  |
| PTPRCAP | TNK2   | GFPT1   | GRK5    | ST14   | TLR4   | PAOX   | PLCG1   | TYMP  |
| PLA2G2C | LGALS3 | PIK3C3  | S1PR5   | HASPIN | CCND2  | KCNK9  | CLK2    | GPR88 |
| KDM4B   | LGALS8 | SLC10A2 | S1PR4   | DYRK3  | TMIGD3 | PRMT3  | KCNK3   | KARS  |
| FGF1    | IL6ST  | OPRL1   | PPP2R5A | MECP2  | SLC1A1 | GRIN2A | HPSE    |       |
| FGF2    | LSS    | AMPD2   | CLK4    | ATR    | USP10  | GRIA2  | LGALS4  |       |

**Table S3 Therapeutic targets for ischemic stroke**

|        |          |         |         |         |        |         |          |          |          |
|--------|----------|---------|---------|---------|--------|---------|----------|----------|----------|
| APP    | SOD2     | FGA     | CLU     | ALOX5   | LAMA2  | HCRT    | SLC6A8   | HLRC1    | CHRM5    |
| IL6    | LCN2     | PDGFB   | EGF     | CD40LG  | ABCB1  | EDNRA   | BCAP31   | CRTR     | CACNA2D1 |
| TNF    | IL18     | CASP9   | PLA2G2A | IL13    | NAGLU  | RELA    | CCCSX    | CMS15    | CACNB2   |
| KRIT1  | PRNP     | GRIK2   | HSPA5   | SLC1A3  | SRC    | EDNRB   | RPRGL2   | CLOVE    | CACNA1D  |
| F2     | NFE2L2   | ANGPT1  | MIR210  | CDH5    | TF     | NOD2    | RPRGL1   | CHDS7    | CALM1    |
| CST3   | HMGB1    | SLC17A5 | IL17A   | CTSB    | ACHE   | IL15    | PRKCL    | CEDNIK   | CYP2B6   |
| COL4A1 | MB       | PARP1   | SMAD2   | CTSD    | MAPK10 | CNTF    | NEDMIC   | CCM1     | CYP2E1   |
| NOS2   | GRIN1    | IL1A    | APOB    | ESR1    | ADORA3 | SOD3    | NEDMLHB  | CCDS2    | CYP3A5   |
| NOS3   | ADAMTS13 | F8      | TXN     | PIK3CG  | MME    | PRKN    | MGC4067  | CADASIL1 | CACNA1G  |
| ICAM1  | NGF      | EGR1    | MBL2    | BMP6    | IDO1   | HSPD1   | MCAP     | C7orf22  | CACNA1H  |
| SOD1   | CD36     | MAP2    | ATP1A2  | MAOA    | CD34   | TFPI    | KURU     | BSS      | CACNA1I  |
| MPO    | NPPA     | G6PD    | TIMP1   | CYP2C19 | AQP1   | PRKAA2  | IDDEBF   | BAP31    | CACNG1   |
| PIK3CA | TSC2     | SETD2   | LTA     | GLUL    | ITPR1  | SST     | GLNRS    | ARMD11   | CACNG2   |
| GFAP   | SLC1A2   | SHH     | SDHB    | CD46    | ACE2   | MYH7    | DXS1357E | AGS1     | CACNG3   |
| ACE    | IGF1     | SNCA    | ITGAM   | ANGPT2  | SLC8A1 | TOMM40  | CVAP     | AGAT     | CACNG4   |
| IL10   | MAPK1    | MBP     | YRDC    | PPARA   | IL33   | MAPK3   | CRV      | ADDL     | CACNG5   |
| TP53   | MTOR     | KCNJ5   | SLC6A3  | NEFL    | SMPD1  | CACNA1B | CPSQ3    | AAA      | CACNG6   |
| CRP    | PTGS2    | REN     | HP      | TSPO    | LPL    | MYC     | CCM3     | AKR1C1   | CACNG7   |
| F5     | PLG      | FLT1    | SMARCA1 | TIMP2   | CAMK2G | IL2RA   | CCDS3    | SLC22A6  | CACNG8   |
| CASP3  | PIK3CA   | HSPB1   | HAVCR1  | MAP2K1  | IKBKG  | STING1  | CCDS1    | CYP2C9   | CACNA2D2 |
| VEGFA  | NTRK1    | CR1     | GRIN2A  | MT-CO1  | SLC9A1 | RHOA    | CASIL    | RPS6KA3  | CACNA2D3 |
| MTHFR  | AGTR1    | CDK5    | MIF     | LOX     | MALAT1 | OLR1    | CAM      | NFKBIA   | CACNA2D4 |

|          |          |          |          |          |        |          |          |         |         |
|----------|----------|----------|----------|----------|--------|----------|----------|---------|---------|
| IL1B     | SERPINA3 | HSPA1A   | CXCL10   | COL1A1   | PCNA   | AOC3     | BDPLT10  | TNFAIP6 | CACNA1F |
| BDNF     | HSPA4    | ACTA2    | PECAM1   | MIR155   | PLA2G7 | FOXP2    | BDPLT1   | IKBKB   | CACNA1S |
| HMOX1    | GP1BA    | SPP1     | PLAU     | SLC12A2  | TNNI3  | CYBB     | ARMD7    | UGT1A6  | CACNB1  |
| TLR4     | KNG1     | APOH     | ADRB2    | ARG1     | PARK7  | IL1R1    | ANKRD15  | NAT2    | CACNB3  |
| VWF      | AKT1     | ADM      | LDLR     | THBS1    | FGFR2  | ALDH2    | VWDP     | SLC22A8 | CACNB4  |
| ALB      | PLA2G6   | VCAM1    | COMT     | CCL5     | ARID1B | ABCA1    | MSCCA    | NEU1    | CACNA1A |
| PTEN     | JAK2     | NTRK2    | CSF1R    | PTGS1    | COX5A  | MCU      | MEPCA    | ATP1A1  | CACNA1E |
| SERPINC1 | IL1RN    | GSR      | NPY      | DNM1L    | PRKCE  | POMC     | MCM      | PDE10A  | MAPK15  |
| CXCL8    | SLC2A1   | PPARG    | SELL     | FMR1     | NGB    | TRPV4    | KIAA0172 | PDE5A   | MAPK4   |
| SERPINE1 | CBS      | AIF1     | PROC     | DAPK1    | LMNA   | DIAPH1   | IMF2     | PDE4A   | MAPK6   |
| MIR21    | CYCS     | HSPG2    | CHAT     | ADA      | CD40   | ITGA2B   | HERNS    | ABCC4   | MAPK7   |
| PLAT     | IL4      | CREB1    | HTR2A    | NF2      | CDKN3  | NTN1     | FRTS1    | ABCC5   | PRKAA1  |
| ENG      | GJA1     | FAS      | SIRT1    | PF4      | GLS    | NGFR     | DDCH     | RCAN1   | PRKAB1  |
| EPO      | AQP4     | NLRP3    | STAT1    | NES      | P2RY12 | TNFRSF1B | CJD      | ORM1    | PRKAB2  |
| GRIN2B   | ELANE    | TLR2     | DRD2     | FN1      | ERCC2  | C4A      | CARASIL  | SLCO1B1 | PRKAG1  |
| MMP9     | GAD1     | TNFRSF1A | PSAP     | LONP1    | NFKB1  | CASP8    | AD1      | SLCO1B3 | PRKAG2  |
| PSEN1    | GPT      | STAT3    | MIR17    | SERPINA1 | HMGCR  | CX3CR1   | RVCLS    | SLCO2B1 | PRKAG3  |
| IFNG     | TGFB2    | MMP2     | EGFR     | CXCL1    | VCP    | ALG14    | MCMTC    | ABCB11  | MT-TL1  |
| CTNNA1   | MIR146A  | CFH      | TGFBR2   | TGFBR1   | CAMK2A | TREX1    | LMNS     | CYP3A4  | ALOX5AP |
| EDN1     | FGB      | MAPK8    | SERPINI1 | MIR29B1  | MPL    | QARS1    | CPSQ2    | UGT1A1  | FBN1    |
| THBD     | MEF2C    | PON1     | HPRT1    | GAPDH    | RAC1   | PDCD10   | CADASIL2 | UGT1A3  | ACSL4   |
| CCL2     | MAPK14   | ADORA1   | NOTCH1   | CXCL2    | CDKN2A | HLA-B    | BDPLT3   | UGT1A10 | APOE    |
| HIF1A    | CXCL12   | CALCA    | CASP1    | SMAD4    | ABCC8  | TAF8     | CWS5     | UGT2B7  | MT-ND1  |
| SMARC    | KDR      | CTLA4    | TERT     | BAD      | MYD88  | CCM2     | CLAPO    | UGT2B1  | ADA2    |



|                |                        |                |             |              |                 |               |             |              |             |
|----------------|------------------------|----------------|-------------|--------------|-----------------|---------------|-------------|--------------|-------------|
| A4             |                        |                |             |              |                 |               |             | 7            |             |
| MAPT           | ODC1                   | SYNGA<br>P1    | TNNT2       | FABP3        | MIR29A          | KANK1         | CCM4        | SLC22A<br>12 | GLA         |
| SELP           | FGF2                   | JUN            | CPT2        | MIR106<br>B  | GJB1            | ACP           | TNFA        | SLC2A9       | RNF213      |
| XDH            | AGT                    | ADORA<br>2A    | ADIPOQ      | PROCR        | YWHAG           | CERCA<br>M    | THPH2       | CYP2C8       | MT-ND4      |
| S100B          | ITGB3                  | VLDLR          | F13A1       | CLCN2        | TGIF1           | ADD3          | THPH1       | CACNA<br>1C  | PDE4D       |
| TGFB1          | MIR126                 | MIR34A         | CCL3        | CXCR4        | IGFBP3          | HTRA1         | TFAR15      | CYP2D6       | MT-CO2      |
| COL3A1         | BAX                    | EPRS1          | CKB         | ATM          | HTRA2           | FOLR1         | TBN         | PDE1B        | MT-CO3      |
| F3             | HGF                    | TEK            | C3          | DLG4         | TJP1            | NINJ2         | SPDA1       | PDE1A        | KAT6B       |
| ENO2           | LEP                    | SLC6A4         | AGER        | MMP1         | ADCYA<br>P1     | TTC5          | QARS        | ADRA1<br>A   | ADD1        |
| BCL2           | COL4A2                 | IDH1           | ALDH5<br>A1 | ACTB         | CSF2            | PRKCH         | PRSS11      | ADRA1<br>D   | GUCY1<br>A1 |
| CAT            | FOS                    | IL2            | ANXA5       | CCND1        | RPS27A          | GATM          | PRIP        | ADRA1<br>B   | GNB3        |
| NOS1           | SPTAN1                 | AIFM1          | CNR1        | THPO         | TRIM8           | GAMT          | PKCL        | CHRM1        | MYH11       |
| NPPB           | APOA1                  | CALR           | MIR145      | AVP          | DNMT1           | DOHH          | NEDCA<br>FD | CHRM2        | F7          |
| SELE           | CSF3                   | ITGB2          | FLNA        | BCL2L1       | ASIC1           | NOTCH<br>3    | NCFTD       | CHRM3        | LPA         |
| INS            | GDNF                   | HSPA8          | CP          | F10          | GRIA1           | SNAP29        | KANK        | CHRM4        | ELN         |
| PTGIS          | SCN5A                  | TTR            | NDE1        | TET2         | ATRIP           | SULT1A<br>3   | TGFB3       | ITGA2        | MYH6        |
| ABCC6          | SLC2A1<br>0            | ACVRL<br>1     | F9          | EPOR         | ATRIP-T<br>REX1 | MIR124-<br>1  | NR3C2       | AGTR2        | MAT2A       |
| PON2           | PRKG1                  | F2R            | TH          | GP6          | PRTN3           | ACTA2-<br>AS1 | HEY2        | MFAP5        | FOXE3       |
| CDKN2<br>B-AS1 | VKORC<br>1             | SH2B3          | ENPP1       | GATA4        | TBXA2<br>R      | NKX2-5        | MMP3        | MYBPC<br>3   | STRK1       |
| PROZ           | MYLK                   | RNF213-<br>AS1 | PPBP        | SERPIN<br>F2 | BMP7            | MIR9-1        | ENTPD1      | BACE1        | MVCD3       |
| SMAD3          | RPL36A<br>-HNRNP<br>H2 | HBB            | POLG        | MROS         | MT-CY<br>B      | F12           | KCNQ1       | DARS2        | FLAP        |
| DCP1           | ICH                    | ACE1           | TACR3       | ITGA4        | BDKRB<br>2      | CPB2          | HCAR2       | HDAC1        |             |

**Table S4 The intersection genes of drug and disease**

|         |        |        |          |         |         |        |
|---------|--------|--------|----------|---------|---------|--------|
| STAT3   | SLC6A3 | TERT   | MAP2K1   | NFKB1   | P2RY12  | CASP3  |
| ESR1    | ADORA3 | FABP3  | ACE2     | ARG1    | ITGA4   | GAPDH  |
| ADORA2A | CSF1R  | NOS2   | CASP1    | NTRK1   | CASP8   | BCL2   |
| MAPK14  | TGFBR1 | PRKCE  | SLC22A12 | DAPK1   | HDAC1   | PARP1  |
| CHRM4   | PPARG  | IL1B   | HCAR2    | MAPT    | CACNA1B | UGT2B7 |
| CHRM5   | PTGS2  | ADRA1A | MMP1     | SNCA    | BACE1   | G6PD   |
| CHRM2   | ACHE   | EDNRA  | PLA2G2A  | DNMT1   | ICAM1   | DRD2   |
| CHRM3   | ADORA1 | PLA2G6 | CACNA2D1 | STAT1   | VCAM1   | ALDH2  |
| PTGS1   | PLA2G7 | ADRA1D | CACNA2D2 | ADA     | SELE    | MYLK   |
| PDE10A  | KDR    | PDE4D  | PDE4A    | NTRK2   | IDO1    | MIF    |
| JUN     | PDE5A  | KCNJ5  | F13A1    | SIRT1   | MPO     | PLG    |
| CHRM1   | MMP3   | HMOX1  | TEK      | KNG1    | HMGCR   | MMP2   |
| ELANE   | CALM1  | BDKRB2 | ADRA1B   | ATM     | CYP2C19 | ADRB2  |
| CTSB    | MME    | HTR2A  | MMP9     | F9      | SLC6A4  | PDE1A  |
| ALOX5   | MAOA   | HIF1A  | NFKBIA   | GRIN1   | PPARA   | MAP2   |
| CNR1    | PIK3CG | NOS1   | CPT2     | NOD2    | TNF     | MAPK7  |
| TBXA2R  | ATP1A1 | AKT1   | CCND1    | BAD     | HSPA1A  | GLUL   |
| PLAU    | MTOR   | XDH    | SLC2A1   | SCN5A   | CXCL8   | SLC1A2 |
| TACR3   | MAPK1  | AOC3   | ACE      | RHOA    | MAPK3   | IL6    |
| IDH1    | PIK3CA | F2R    | CACNA1C  | SELL    | TTR     | CDK5   |
| ALOX5AP | F2     | GRIN2B | PON1     | SLC22A6 | SLCO1B1 | EDNRB  |
| MAPK8   | F10    | AKR1C1 | PLAT     | TP53    | SELP    | TLR4   |
| MAPK10  | REN    | NR3C2  | IGFBP3   | TH      | CACNA1H | MPL    |
| SRC     | BCL2L1 | NLRP3  | F8       | NOS3    | ITGA2B  | EGFR   |
| VCP     | CYP2C9 | FOLR1  | ACVRL1   | YWHAG   | CXCR4   | SHH    |
| TSPO    | CYP3A4 | PRKCH  | AGTR1    | VEGFA   | CPB2    | GSR    |
| FLT1    | GRIA1  | TRPV4  | IKBKB    | PDE1B   | RPS6KA3 | F3     |
| JAK2    | APP    | ABCB1  | SERPINE1 | FGF2    | CASP9   | HPRT1  |
| CACNA1D | CTSD   | IL2    | COMT     | GRIN2A  | SLC9A1  | GRIK2  |

**Table S5 The key active ingredients of NDSP**

| Degree | Name                                                                                                             | Neighborhood Connectivity | Radiality   | Topological Coefficient |
|--------|------------------------------------------------------------------------------------------------------------------|---------------------------|-------------|-------------------------|
| 35     | Officinalic Acid                                                                                                 | 11.77142857               | 0.992047192 | 0.131358885             |
| 33     | baicalein                                                                                                        | 18.90909091               | 0.992541347 | 0.179090909             |
| 32     | Cnidium Lactone                                                                                                  | 15.65625                  | 0.992603116 | 0.142293689             |
| 32     | senkyunone                                                                                                       | 17.34375                  | 0.992634001 | 0.157151442             |
| 32     | lignan                                                                                                           | 13.9375                   | 0.992201615 | 0.14375                 |
| 32     | (-)-Dicentrine                                                                                                   | 16.6875                   | 0.992479577 | 0.158459596             |
| 31     | quercetin                                                                                                        | 18.83870968               | 0.992603116 | 0.171526055             |
| 31     | Panaxydol                                                                                                        | 20.38709677               | 0.992541347 | 0.190069576             |
| 31     | Proscillaridin A                                                                                                 | 16.12903226               | 0.992325154 | 0.159252971             |
| 30     | Dauricine                                                                                                        | 13.9                      | 0.992325154 | 0.134375                |
| 30     | quercetagetin                                                                                                    | 19                        | 0.992386923 | 0.183673469             |
| 30     | 3,7,11-Trimethyldodeca-1,7,10-Trien-3-Ol-9-One                                                                   | 20.2                      | 0.992417808 | 0.193939394             |
| 29     | wallichilide                                                                                                     | 17.37931034               | 0.992325154 | 0.16885887              |
| 29     | 6-Hydroxykaempferol                                                                                              | 18.96551724               | 0.992356039 | 0.183321605             |
| 29     | kaempferol                                                                                                       | 20.34482759               | 0.992479577 | 0.189655172             |
| 29     | Gamma-Decanolactone                                                                                              | 19.34482759               | 0.992479577 | 0.179851251             |
| 28     | 4-[(E)-4-(3,5-dimethoxy-4-oxo-1-cyclohexa-2,5-dienylidene)but-2-enylidene]-2,6-dimethoxycyclohexa-2,5-dien-1-one | 22.03571429               | 0.992294269 | 0.216863034             |
| 28     | luteolin                                                                                                         | 20.67857143               | 0.992448693 | 0.192927171             |
| 28     | Eburicoic Acid                                                                                                   | 21.82142857               | 0.992417808 | 0.206152758             |
| 27     | Sedanonic Acid                                                                                                   | 16.25925926               | 0.992448693 | 0.148148148             |
| 27     | 15a,20a-Dihydroxy-a4-Pregn-3-One                                                                                 | 21.66666667               | 0.992448693 | 0.200647249             |
| 27     | Pyrethrin II                                                                                                     | 17.03703704               | 0.992078077 | 0.176231176             |
| 26     | 3-[(2,6-Dideoxy-3-o-methylhexopyranosyl)oxy]-14-hydroxycard-20(22)-enolide(pubchem)                              | 15.84615385               | 0.9922325   | 0.153053132             |
| 26     | Ethyl Linoleate                                                                                                  | 19.46153846               | 0.992325154 | 0.184615385             |
| 26     | Senkyunolide K                                                                                                   | 18.57692308               | 0.992263385 | 0.179356358             |
| 26     | Dalbergenone                                                                                                     | 21.88461538               | 0.992201615 | 0.217548077             |
| 26     | DFV                                                                                                              | 16.76923077               | 0.992325154 | 0.157692308             |
| 26     | Panaxadiol                                                                                                       | 21.57692308               | 0.992417808 | 0.199775952             |
| 26     | Ethylnotopterol                                                                                                  | 19.69230769               | 0.991985422 | 0.210025929             |
| 25     | Cyclo-(Ala-Val)                                                                                                  | 20.92                     | 0.992356039 | 0.195294118             |
| 24     | (Z,Z')-Diligustilide                                                                                             | 19.375                    | 0.992263385 | 0.18375                 |
| 24     | 1-Methoxy-2-Methylanthraquinone                                                                                  | 19.5                      | 0.992201615 | 0.18877551              |

|    |                                                                                     |             |             |             |
|----|-------------------------------------------------------------------------------------|-------------|-------------|-------------|
| 24 | N-Butyl-2-Ethylbutylphthalate                                                       | 18.20833333 | 0.992078077 | 0.183067376 |
| 24 | Z-Ligustilide                                                                       | 19.91666667 | 0.992263385 | 0.189166667 |
| 24 | 6-Hydroxynaringenin                                                                 | 18.25       | 0.992201615 | 0.176020408 |
| 24 | Onjixanthone I                                                                      | 19.5        | 0.992139846 | 0.192708333 |
| 23 | Cocaine                                                                             | 19.73913043 | 0.992170731 | 0.191215617 |
| 23 | Mandenol                                                                            | 20.91304348 | 0.992356039 | 0.191471572 |
| 23 | Coumestrol                                                                          | 19.91304348 | 0.992170731 | 0.19299024  |
| 23 | Suchilactone                                                                        | 14.30434783 | 0.991583921 | 0.168409466 |
| 22 | Z'-3,8-Dihydro-6.6',7.3'a-diligustilide                                             | 20.72727273 | 0.992016307 | 0.209864603 |
| 22 | Coumingidine                                                                        | 12.72727273 | 0.991491267 | 0.152302243 |
| 21 | 2,3-Dihydro-5,7-Dihydroxy-2,6-Dimethyl-8-(3-Methyl-2-Butenyl)-4h-1-Benzopyran-4-One | 23.14285714 | 0.992356039 | 0.208894879 |
| 21 | Dillapiol                                                                           | 22.57142857 | 0.992016307 | 0.227067669 |
| 21 | Dimethyl Camphorate                                                                 | 21.38095238 | 0.992047192 | 0.212301587 |
| 21 | ursolic acid                                                                        | 22.04761905 | 0.992078077 | 0.216985763 |
| 20 | Vallesiachotamine                                                                   | 18.7        | 0.991954538 | 0.188297872 |
| 20 | 3'-Methoxydaidzein                                                                  | 17.8        | 0.992108961 | 0.16969697  |
| 20 | Cyclo-(Ala-Pro)                                                                     | 16.7        | 0.991923653 | 0.168817204 |
| 19 | Dehydroeburicoic Acid                                                               | 18.89473684 | 0.992108961 | 0.178947368 |
| 18 | Citronellal                                                                         | 18.05555556 | 0.991892768 | 0.18144208  |
| 17 | Myricanone                                                                          | 20.94117647 | 0.991954538 | 0.205579139 |
| 17 | Senkyunolide                                                                        | 17.47058824 | 0.991583921 | 0.193771626 |
| 17 | formononetin                                                                        | 20.94117647 | 0.991954538 | 0.205579139 |
| 17 | Linoleyl Acetate                                                                    | 16.41176471 | 0.991676576 | 0.17513369  |
| 16 | Dicapryl Phthalate                                                                  | 16.875      | 0.991583921 | 0.184593023 |
| 16 | Ethyl Pyroglutamate                                                                 | 20.5625     | 0.99176923  | 0.21263587  |
| 16 | Lanosterol                                                                          | 24.0625     | 0.991861884 | 0.242763158 |
| 15 | (Z)-6,7-Epoxy-6,7-Dihydroligustilide                                                | 22.53333333 | 0.991830999 | 0.226666667 |
| 15 | Clionasterol                                                                        | 24.86666667 | 0.992170731 | 0.225157233 |
| 15 | Kudzusapogenol C                                                                    | 23.86666667 | 0.99170746  | 0.251282051 |
| 14 | beta-sitosterol                                                                     | 24.21428571 | 0.991830999 | 0.241815476 |
| 14 | (-)-2d,4d,6d,8d-Tetramethyl Undecanoic Acid                                         | 14.07142857 | 0.991398613 | 0.159407666 |
| 14 | Sandaracopimarinol                                                                  | 25.42857143 | 0.991954538 | 0.244285714 |
| 14 | Eburicol                                                                            | 24.71428571 | 0.99176923  | 0.252279635 |
| 13 | Citronellol                                                                         | 28.30769231 | 0.991800114 | 0.284455128 |
| 13 | CLR                                                                                 | 23.76923077 | 0.991491267 | 0.264758497 |
| 13 | Onjixanthone Ii                                                                     | 21.23076923 | 0.991583921 | 0.227312014 |
| 13 | 2,8-Dimethyl-5-Acetyl-Bicycl                                                        | 23.61538462 | 0.991645691 | 0.24852071  |

|    |                                                      |             |             |             |
|----|------------------------------------------------------|-------------|-------------|-------------|
|    | o[5,3,0] Decadiene-1,8                               |             |             |             |
| 13 | 1-Ethyl-4,8-Dimethoxy-Beta-Carboline                 | 17.69230769 | 0.991305959 | 0.208653846 |
| 12 | sitosterol                                           | 25.5        | 0.99170746  | 0.260638298 |
| 11 | Butylphthalide                                       | 18.18181818 | 0.991058882 | 0.232186732 |
| 11 | Robustadiol A                                        | 22.09090909 | 0.991645691 | 0.226783969 |
| 11 | Robinin                                              | 20.81818182 | 0.991367729 | 0.235930736 |
| 11 | 7,8-dimethyl-1H-pyrimido[5,6-g]quinoxaline-2,4-dione | 14.81818182 | 0.990842689 | 0.20624152  |
| 11 | Sagittariol                                          | 25.18181818 | 0.991491267 | 0.274793388 |
| 10 | Terpinen-4-Ol                                        | 27.6        | 0.991645691 | 0.282978723 |
| 10 | (-)-Tuberosin                                        | 19.6        | 0.991336844 | 0.221428571 |
| 10 | Tuberosin                                            | 19.6        | 0.991336844 | 0.221428571 |
| 10 | Baicalin                                             | 20.2        | 0.991275075 | 0.234146341 |
| 10 | qt_carthamone                                        | 10.7        | 0.990472073 | 0.173214286 |
| 10 | Stigmasterol                                         | 27.3        | 0.991460383 | 0.298863636 |
| 10 | Sitogluside                                          | 22.7        | 0.991460383 | 0.246590909 |
| 9  | lupeol-palmitate                                     | 22.11111111 | 0.991058882 | 0.277777778 |
| 9  | Coprine                                              | 12.22222222 | 0.990873574 | 0.16031746  |
| 9  | Poriferasterol                                       | 27.44444444 | 0.991336844 | 0.311111111 |
| 8  | Glyceryl palmitate                                   | 15.25       | 0.991027997 | 0.1875      |
| 8  | Kudzusapogenol B Methyl Ester                        | 15.375      | 0.99071915  | 0.21780303  |
| 8  | ginsenoside rh2                                      | 12.75       | 0.990410303 | 0.209821429 |
| 7  | Puerarol                                             | 13.57142857 | 0.990441188 | 0.216748768 |
| 7  | ginsenoside f2                                       | 10.28571429 | 0.989947033 | 0.221088435 |
| 7  | Notoginsenoside R1                                   | 10.28571429 | 0.989947033 | 0.221088435 |
| 7  | 3-Methylhistidin                                     | 13.57142857 | 0.990441188 | 0.216748768 |
| 6  | Borneol                                              | 24.66666667 | 0.991089766 | 0.295833333 |
| 6  | Daidzein-4,7-diglucoside                             | 14.83333333 | 0.990224995 | 0.266025641 |
| 6  | 2-Hexanol                                            | 19          | 0.990750035 | 0.260869565 |
| 6  | Dehydroshikimic Acid                                 | 23.5        | 0.990997112 | 0.292207792 |
| 6  | Cyclododecanone                                      | 23.16666667 | 0.99071915  | 0.325980392 |
| 5  | Spathulenol                                          | 23          | 0.990657381 | 0.328358209 |
| 5  | Alpha-Onocerin                                       | 28.6        | 0.991089766 | 0.340740741 |
| 4  | Epoxydihydrolinalool                                 | 23.5        | 0.990564727 | 0.346153846 |
| 4  | 3-Methyl-1,2-Cyclopentanediol                        | 22.5        | 0.990472073 | 0.346774194 |
| 3  | FA                                                   | 15.33333333 | 0.98973084  | 0.367521368 |
| 3  | Fenchone                                             | 30          | 0.990564727 | 0.439393939 |
| 3  | Squalene                                             | 23          | 0.990008802 | 0.458333333 |
| 2  | Camphor                                              | 28          | 0.990008802 | 0.551020408 |
| 2  | L-Valine-L-Valine Anhydride                          | 27          | 0.989977917 | 0.541666667 |
| 2  | Methyl Phenyl Carbinol                               | 19          | 0.989576416 | 0.5         |

|   |                          |      |             |             |
|---|--------------------------|------|-------------|-------------|
| 2 | 3,4-Dimethylbenzoic Acid | 22.5 | 0.98973084  | 0.5375      |
| 2 | Cycloeucaleanol          | 21   | 0.989638186 | 0.540540541 |
| 2 | 4-Methylcyclohexanone    | 21   | 0.989576416 | 0.571428571 |

---

**Table S6 The core target of NDSP**

| <b>Degree</b> | <b>Name</b> | <b>Neighborhood<br/>Connectivity</b> | <b>Radiality</b> | <b>Topological<br/>Coefficient</b> |
|---------------|-------------|--------------------------------------|------------------|------------------------------------|
| 39            | MAPK3       | 15.74358974                          | 0.969262621      | 0.138101664                        |
| 39            | SRC         | 15.15384615                          | 0.971651537      | 0.126912303                        |
| 37            | MAPK1       | 15.75675676                          | 0.968784838      | 0.139440325                        |
| 37            | STAT3       | 15.78378378                          | 0.969581143      | 0.145895896                        |
| 36            | TP53        | 13.88888889                          | 0.96751075       | 0.138333333                        |
| 29            | AKT1        | 16.44827586                          | 0.966236662      | 0.156321839                        |
| 28            | JUN         | 18                                   | 0.966555184      | 0.166666667                        |
| 24            | NFKB1       | 17.29166667                          | 0.964484791      | 0.169526144                        |
| 24            | MAPK14      | 18.91666667                          | 0.96432553       | 0.188333333                        |
| 23            | PIK3CA      | 17                                   | 0.96432553       | 0.17                               |
| 21            | ESR1        | 20.0952381                           | 0.965440357      | 0.192765568                        |
| 21            | VEGFA       | 15.42857143                          | 0.962255136      | 0.17281969                         |
| 20            | EGFR        | 19.55                                | 0.965121835      | 0.189805825                        |
| 20            | IL6         | 17.65                                | 0.961140309      | 0.205232558                        |
| 19            | F2          | 11.05263158                          | 0.959388438      | 0.12879257                         |
| 19            | JAK2        | 18.21052632                          | 0.963369963      | 0.189144737                        |
| 18            | MAPK8       | 17.61111111                          | 0.963210702      | 0.185380117                        |
| 18            | RHOA        | 17.5                                 | 0.961777353      | 0.193209877                        |
| 17            | STAT1       | 22.94117647                          | 0.962732919      | 0.229411765                        |
| 17            | TNF         | 15.88235294                          | 0.957955088      | 0.208204334                        |
| 16            | IL2         | 21.6875                              | 0.958910655      | 0.252180233                        |
| 16            | HDAC1       | 15.5625                              | 0.958432871      | 0.203125                           |
| 15            | NFKBIA      | 22.33333333                          | 0.962573658      | 0.224915825                        |
| 14            | CASP3       | 18.42857143                          | 0.957636566      | 0.219387755                        |
| 14            | CASP8       | 19.21428571                          | 0.959069916      | 0.218344156                        |
| 14            | IL1B        | 17.28571429                          | 0.956999522      | 0.227443609                        |
| 13            | APP         | 8.923076923                          | 0.952221691      | 0.147214854                        |
| 13            | CXCR4       | 14.61538462                          | 0.957318044      | 0.199157007                        |
| 13            | HIF1A       | 24.30769231                          | 0.959547699      | 0.27008547                         |
| 13            | MAP2K1      | 21                                   | 0.959229177      | 0.236888112                        |
| 12            | NOS2        | 19                                   | 0.960503265      | 0.213068182                        |
| 12            | MTOR        | 18.25                                | 0.956043956      | 0.246621622                        |
| 12            | CALM1       | 8.25                                 | 0.952699474      | 0.145833333                        |
| 12            | SIRT1       | 15.83333333                          | 0.954929129      | 0.232843137                        |
| 12            | FGF2        | 17.66666667                          | 0.954929129      | 0.256038647                        |
| 11            | NOS3        | 13.45454545                          | 0.954610607      | 0.178181818                        |
| 11            | BCL2L1      | 22.72727273                          | 0.956840261      | 0.284090909                        |
| 11            | PLG         | 6.363636364                          | 0.946169772      | 0.1875                             |
| 11            | PPARA       | 16.90909091                          | 0.95508839       | 0.214452214                        |
| 10            | BAD         | 17.7                                 | 0.953177258      | 0.298305085                        |
| 10            | BCL2        | 24.3                                 | 0.958114349      | 0.296341463                        |

|    |          |             |             |             |
|----|----------|-------------|-------------|-------------|
| 10 | NTRK1    | 21.3        | 0.957318044 | 0.267088608 |
| 10 | MMP1     | 13.5        | 0.951903169 | 0.235087719 |
| 9  | GAPDH    | 16.88888889 | 0.956999522 | 0.217893218 |
| 9  | TERT     | 25.55555556 | 0.955566173 | 0.345345345 |
| 9  | IKBKB    | 13.88888889 | 0.948399427 | 0.248484848 |
| 9  | CCND1    | 24          | 0.958910655 | 0.282352941 |
| 9  | CXCL8    | 20.55555556 | 0.957158783 | 0.289514867 |
| 9  | MMP2     | 18          | 0.954451346 | 0.276923077 |
| 9  | MMP9     | 18.44444444 | 0.955406912 | 0.263492063 |
| 8  | ADRB2    | 11.125      | 0.952858735 | 0.18220339  |
| 8  | PTGS2    | 16.625      | 0.953814302 | 0.246268657 |
| 8  | SNCA     | 12          | 0.954929129 | 0.176136364 |
| 8  | PPARG    | 19          | 0.952221691 | 0.296875    |
| 8  | GRIN2B   | 9           | 0.951106864 | 0.1796875   |
| 8  | KDR      | 19.125      | 0.954451346 | 0.269366197 |
| 7  | EDNRA    | 16          | 0.950788342 | 0.278195489 |
| 7  | MAPT     | 19.42857143 | 0.951903169 | 0.326876513 |
| 7  | PARP1    | 14          | 0.94887721  | 0.291666667 |
| 7  | CASP1    | 14.85714286 | 0.949992037 | 0.245238095 |
| 7  | CDK5     | 15.57142857 | 0.953336519 | 0.244239631 |
| 7  | IGFBP3   | 17.57142857 | 0.955566173 | 0.238747554 |
| 7  | MMP3     | 17.14285714 | 0.949832776 | 0.317460317 |
| 7  | TLR4     | 15          | 0.949036471 | 0.303206997 |
| 7  | TEK      | 18.57142857 | 0.952380952 | 0.271008403 |
| 6  | CYP3A4   | 4           | 0.929288103 | 0.282051282 |
| 6  | AGTR1    | 8.166666667 | 0.946169772 | 0.206140351 |
| 6  | CHRM1    | 18.66666667 | 0.953655041 | 0.266666667 |
| 6  | SERPINE1 | 10          | 0.94887721  | 0.210144928 |
| 6  | YWHAG    | 23.33333333 | 0.948399427 | 0.424242424 |
| 6  | CASP9    | 22.83333333 | 0.94887721  | 0.415151515 |
| 6  | NOS1     | 10          | 0.947762383 | 0.226190476 |
| 6  | MAOA     | 3.833333333 | 0.913680522 | 0.282051282 |
| 6  | CYP2C9   | 5.166666667 | 0.932154802 | 0.322916667 |
| 6  | CYP2C19  | 5.833333333 | 0.933269629 | 0.291666667 |
| 6  | SLC9A1   | 23.16666667 | 0.951425386 | 0.367724868 |
| 6  | PRKCE    | 23.66666667 | 0.951584647 | 0.376344086 |
| 5  | KNG1     | 5.4         | 0.933588151 | 0.317647059 |
| 5  | ADRA1B   | 9.4         | 0.942028986 | 0.2875      |
| 5  | CACNA1C  | 5.8         | 0.936614111 | 0.245454545 |
| 5  | ITGA2B   | 16          | 0.946488294 | 0.312       |
| 5  | PIK3CG   | 19.4        | 0.949354993 | 0.359259259 |
| 5  | ALOX5    | 5           | 0.931677019 | 0.369230769 |
| 5  | MAPK10   | 21          | 0.950788342 | 0.338709677 |
| 5  | NLRP3    | 12.2        | 0.943940118 | 0.342857143 |



|   |          |             |             |             |
|---|----------|-------------|-------------|-------------|
| 5 | DNMT1    | 21.6        | 0.950310559 | 0.348387097 |
| 5 | PLAU     | 19          | 0.952858735 | 0.301587302 |
| 5 | FLT1     | 20.6        | 0.95046982  | 0.374545455 |
| 5 | HSPA1A   | 28.4        | 0.95206243  | 0.43030303  |
| 5 | VCAM1    | 13.2        | 0.949514254 | 0.254901961 |
| 4 | ACE      | 8.25        | 0.939480809 | 0.32        |
| 4 | REN      | 4.25        | 0.923873228 | 0.444444444 |
| 4 | COMT     | 4           | 0.912087912 | 0.416666667 |
| 4 | PTGS1    | 5           | 0.91017678  | 0.475       |
| 4 | F9       | 6           | 0.932791846 | 0.338235294 |
| 4 | ATM      | 18.25       | 0.946329033 | 0.39673913  |
| 4 | CACNA2D1 | 2.75        | 0.911928651 | 0.45        |
| 4 | DAPK1    | 23.75       | 0.954929129 | 0.347014925 |
| 4 | DRD2     | 4           | 0.93183628  | 0.25        |
| 4 | F10      | 7.5         | 0.936614111 | 0.340909091 |
| 4 | F3       | 9.5         | 0.938206721 | 0.355769231 |
| 4 | ITGA4    | 16          | 0.949514254 | 0.315       |
| 4 | GRIN1    | 14.25       | 0.94887721  | 0.316666667 |
| 4 | GRIN2A   | 14.25       | 0.94887721  | 0.316666667 |
| 4 | NTRK2    | 23.5        | 0.954132824 | 0.3671875   |
| 4 | ICAM1    | 11.5        | 0.945532728 | 0.275       |
| 4 | MPL      | 24          | 0.947921644 | 0.489795918 |
| 4 | PRKCH    | 29.25       | 0.950310559 | 0.5         |
| 3 | ABCB1    | 20          | 0.948240166 | 0.401360544 |
| 3 | ALDH2    | 4.333333333 | 0.895365504 | 0.619047619 |
| 3 | AOC3     | 4.333333333 | 0.895365504 | 0.619047619 |
| 3 | ARG1     | 9.666666667 | 0.939958592 | 0.412698413 |
| 3 | CACNA1D  | 3.666666667 | 0.91176939  | 0.523809524 |
| 3 | MYLK     | 29.33333333 | 0.947921644 | 0.630434783 |
| 3 | NOD2     | 7.666666667 | 0.931199236 | 0.488888889 |
| 3 | CPB2     | 10.66666667 | 0.937091894 | 0.430555556 |
| 3 | SLC6A3   | 5           | 0.934065934 | 0.388888889 |
| 3 | MPO      | 2.333333333 | 0.908902692 | 0.333333333 |
| 3 | F8       | 9           | 0.935977066 | 0.428571429 |
| 3 | PLAT     | 12          | 0.939321548 | 0.444444444 |
| 3 | RPS6KA3  | 25.66666667 | 0.94425864  | 0.64957265  |
| 3 | TH       | 11.66666667 | 0.943940118 | 0.365591398 |
| 2 | ACE2     | 2.5         | 0.898709986 | 0.5         |
| 2 | ADA      | 1           | 1           | 0           |
| 2 | BDKRB2   | 8           | 0.929925147 | 0.615384615 |
| 2 | CACNA1B  | 8           | 0.928014015 | 0.538461538 |
| 2 | CACNA2D2 | 4           | 0.911291607 | 0.8         |
| 2 | F2R      | 11          | 0.934702978 | 0.55        |
| 2 | CTSB     | 3.5         | 0.922439879 | 0.5         |

|   |         |      |             |             |
|---|---------|------|-------------|-------------|
| 2 | CTSD    | 11.5 | 0.940595636 | 0.5         |
| 2 | UGT2B7  | 6    | 0.910336041 | 0.666666667 |
| 2 | EDNRB   | 15.5 | 0.940595636 | 0.537037037 |
| 2 | ELANE   | 6.5  | 0.929288103 | 0.5         |
| 2 | F13A1   | 11.5 | 0.935977066 | 0.525       |
| 2 | G6PD    | 22.5 | 0.944099379 | 0.576923077 |
| 2 | HMOX1   | 26   | 0.943143813 | 0.702702703 |
| 2 | SELP    | 4.5  | 0.926102883 | 0.5         |
| 2 | SELE    | 4.5  | 0.928651059 | 0.642857143 |
| 2 | TBXA2R  | 5    | 0.926421405 | 0.8         |
| 1 | MME     | 2    | 0.873228221 | 0           |
| 1 | ACHE    | 13   | 0.926739927 | 0           |
| 1 | ACVRL1  | 1    | 1           | 0           |
| 1 | TGFBR1  | 1    | 1           | 0           |
| 1 | ADORA1  | 2    | 0.75        | 0           |
| 1 | ADORA3  | 2    | 0.75        | 0           |
| 1 | ADRA1A  | 5    | 0.916547221 | 0           |
| 1 | PDE4A   | 8    | 0.927376971 | 0           |
| 1 | PDE4D   | 8    | 0.927376971 | 0           |
| 1 | AKR1C1  | 6    | 0.903806339 | 0           |
| 1 | ALOX5AP | 5    | 0.906195254 | 0           |
| 1 | TTR     | 13   | 0.926739927 | 0           |
| 1 | BACE1   | 13   | 0.926739927 | 0           |
| 1 | CACNA1H | 4    | 0.886446886 | 0           |
| 1 | SCN5A   | 12   | 0.92721771  | 0           |
| 1 | CNR1    | 4    | 0.906354515 | 0           |
| 1 | CPT2    | 11   | 0.929606625 | 0           |
| 1 | CSF1R   | 21   | 0.936773372 | 0           |
| 1 | MIF     | 13   | 0.93183628  | 0           |
| 1 | HMGCR   | 11   | 0.929606625 | 0           |
| 1 | HPRT1   | 1    | 1           | 0           |
| 1 | XDH     | 1    | 1           | 0           |
| 1 | HTR2A   | 1    | 1           | 0           |
| 1 | SLC6A4  | 1    | 1           | 0           |
| 1 | IDH1    | 12   | 0.9350215   | 0           |
| 1 | IDO1    | 6    | 0.888198758 | 0           |
| 1 | SHH     | 13   | 0.933747412 | 0           |
| 1 | MAPK7   | 3    | 0.918776875 | 0           |
| 1 | PON1    | 3    | 0.883420927 | 0           |
| 1 | VCP     | 15   | 0.937091894 | 0           |
| 1 | SLC2A1  | 36   | 0.942028986 | 0           |
| 1 | TRPV4   | 39   | 0.946169772 | 0           |

---

Table S7 Parameters of molecular docking

| Name             | Compound Structure                                                                  | Target         | Docking score | Hbond Number | Combination Type                                                                                         | Interaction Residue                                                                |
|------------------|-------------------------------------------------------------------------------------|----------------|---------------|--------------|----------------------------------------------------------------------------------------------------------|------------------------------------------------------------------------------------|
| Officinalic Acid | 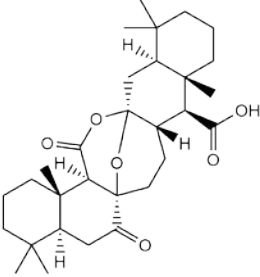   | Erk1<br>(2ZOQ) | N.A.          | N.A.         | N.A.                                                                                                     | N.A.                                                                               |
|                  |                                                                                     | Erk2<br>(4G6N) | -0.323        | 1            | Van der Waals<br>Attractive<br>Charge<br>Conventional<br>Hydrogn Bond<br>Carbon<br>Hydrogn Bond<br>Alkyl | GLY30<br>GLU31<br>LYS112<br>CYS164                                                 |
| Baicalein        |  | Erk1<br>(2ZOQ) | -8.219        | 3            | Van der Waals<br>Conventional<br>Hydrogn Bond<br>Metal-Acceptor<br>Pi-Cation<br>Pi-Alkyl                 | ILE48<br>VAL56<br>ALA69<br>ASP123<br>MET125<br>LYS131<br>LEU173<br>CYS183<br>NA381 |
|                  |                                                                                     | Erk2<br>(4G6N) | -7.300        | 3            | Van der Waals<br>Conventional<br>Hydrogn Bond<br>Carbon<br>Hydrogn Bond<br>Pi-Sulfur<br>Pi-Alkyl         | VAL37<br>ALA50<br>LYS52<br>GLU69<br>LEU154<br>CYS164                               |
| Cnidium Lactone  |  | Erk1<br>(2ZOQ) | -5.299        | 0            | Van der Waals<br>Metal-Acceptor<br>Alkyl                                                                 | ILE48<br>VAL56<br>NA381                                                            |
|                  |                                                                                     | Erk2<br>(4G6N) | -5.204        | 0            | Van der Waals<br>Conventional<br>Hydrogn Bond<br>Alkyl                                                   | ALA50<br>LYS52<br>MET106<br>LEU154                                                 |

|            |                                                                                     |                |        |   |                                                                                                                                                   |                                                                                                                                                    |
|------------|-------------------------------------------------------------------------------------|----------------|--------|---|---------------------------------------------------------------------------------------------------------------------------------------------------|----------------------------------------------------------------------------------------------------------------------------------------------------|
| Senkyunone | 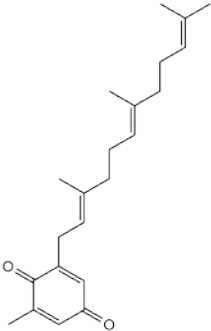   | Erk1<br>(2ZOQ) | -4.891 | 0 | Van der Waals<br>Metal-Acceptor<br>Alkyl<br>Pi-Alkyl                                                                                              | ALA52<br>TYR53<br>VAL56<br>ALA69<br>LEU173<br>NA381<br>ILE29                                                                                       |
|            |                                                                                     | Erk2<br>(4G6N) | -4.244 | 0 | Van der Waals<br>Conventional<br>Hydrogn Bond<br>Alkyl<br>Pi-Alkyl                                                                                | ALA50<br>LYS52<br>ILE82<br>LYS112<br>LEU154<br>CYS164<br>ASP165                                                                                    |
| Lignan     |  | Erk1<br>(2ZOQ) | -3.623 | 3 | Van der Waals<br>Conventional<br>Hydrogn Bond<br>Carbon<br>Hydrogn Bond<br>Metal-Acceptor<br>Pi-Anion<br>Amide-Pi<br>Stacked<br>Alkyl<br>Pi-Alkyl | TYR47<br>GLY49<br>GLU50<br>GLY51<br>GLY54<br>VAL56<br>LYS131<br>LYS168<br>SER170<br>ASN171<br>CYS183<br>ASP184<br>NA381<br>ILE29<br>GLU31<br>GLY32 |
|            |                                                                                     | Erk2<br>(4G6N) | -5.895 | 3 | Van der Waals<br>Conventional<br>Hydrogn Bond<br>Carbon<br>Hydrogn Bond<br>Alkyl<br>Pi-Alkyl                                                      | VAL37<br>ALA50<br>LYS52<br>MET106<br>GLU107<br>LYS112<br>SER151<br>ASN152<br>LEU154                                                                |

|                |                                                                                   |                |        |   |                                                                                                                                                        |                                                                |
|----------------|-----------------------------------------------------------------------------------|----------------|--------|---|--------------------------------------------------------------------------------------------------------------------------------------------------------|----------------------------------------------------------------|
| (-)-Dicentrine | 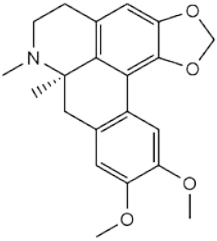 | Erk1<br>(2ZOQ) | 3.520  | 2 | Van der Waals<br>Attractive<br>Charge<br>Conventional<br>Hydrogn Bond<br>Pi-Cation<br>Amide-Pi<br>Stacked<br>Pi-Alkyl<br>Van der Waals<br>Conventional | GLY49<br>GLU50<br>ALA52<br>ASP166<br>LYS168<br>ASP184<br>ALA50 |
|                |                                                                                   | Erk2<br>(4G6N) | -5.471 | 2 | Hydrogn Bond<br>Carbon<br>Hydrogn Bond<br>Pi-Anion<br>Pi-Alkyl                                                                                         | GLN103<br>MET106<br>ASP109<br>LEU154                           |

### Supplementary Figure 1 Full-length blots/gels

1. Full-length pictures of the blots and gels presented in Figure 1

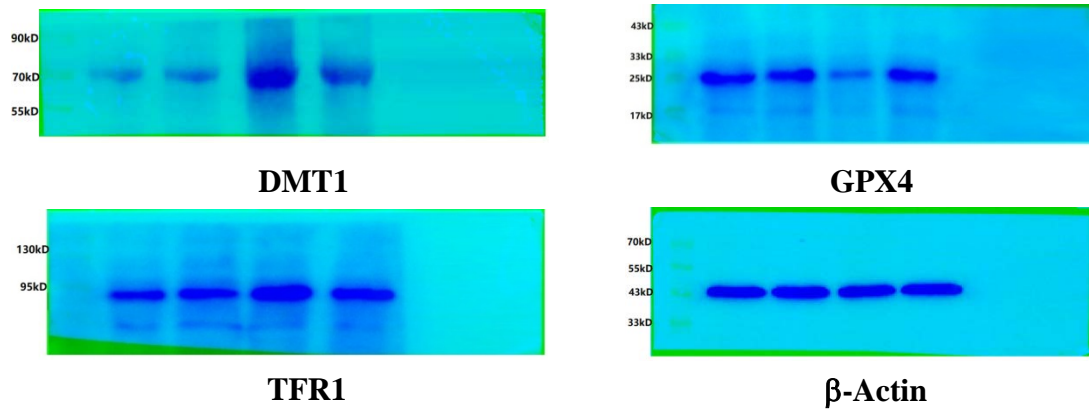

2. Full-length pictures of the blots and gels presented in Figure 3

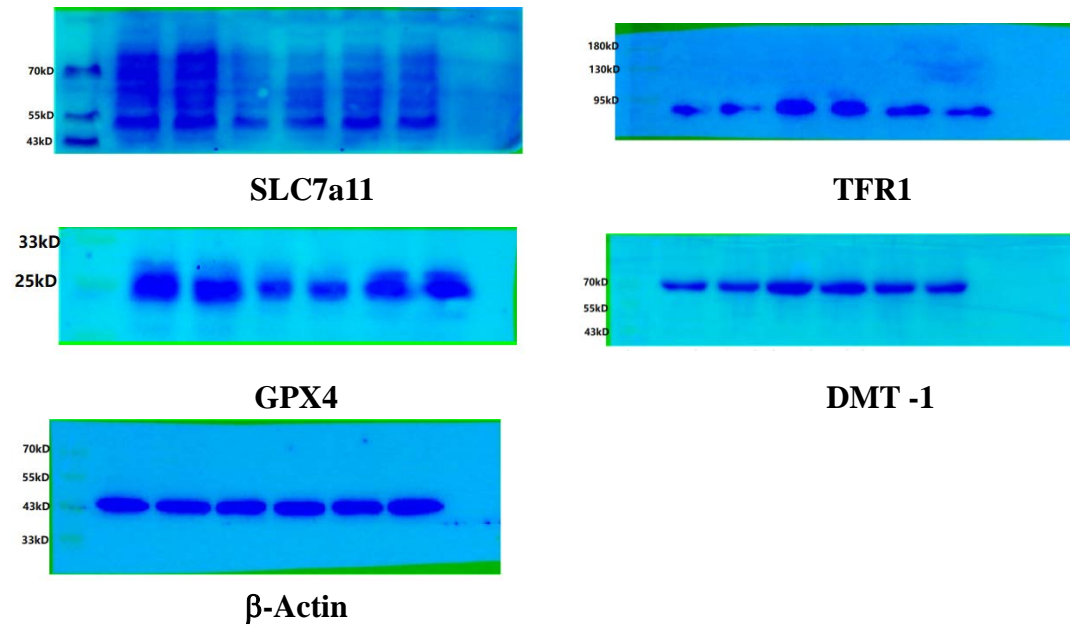

3. Full-length pictures of the blots and gels presented in Figure 6

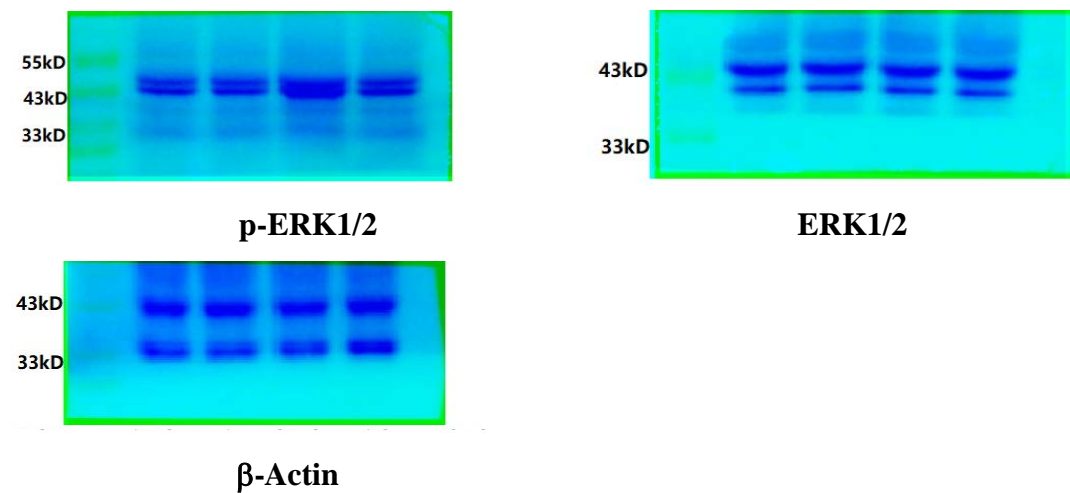

Supplement: Supplementary file 1 [file get_supplementary_file.php]
